1 A multiscale model predicts the sensitivity of  
2 *Chlorella vulgaris* to light and nitrogen levels  
3 in photobioreactors

4 Juan D. Tibocho-Bonilla<sup>1,2</sup>, Cristal Zuniga<sup>2</sup>, Jared T. Broddrick<sup>3\*\*</sup>, Karsten Zengler<sup>2,3,4</sup>, Rubén D.  
5 Godoy-Silva<sup>1\*</sup>.

6 <sup>1</sup>Grupo de Investigación en Procesos Químicos y Bioquímicos, Departamento de Ingeniería Química y Ambiental,  
7 Universidad Nacional de Colombia, Av. Carrera 30 No. 45-03, Bogotá, D.C. Colombia.

8 <sup>2</sup>Department of Pediatrics, University of California, San Diego, 9500 Gilman Drive, La Jolla, CA 92093-0760 USA.

9 <sup>3</sup>Department of Bioengineering, University of California, San Diego, 9500 Gilman Drive, La Jolla, CA 92093-0412  
10 USA.

11 <sup>4</sup>Center for Microbiome Innovation, University of California, San Diego, 9500 Gilman Drive, La Jolla, CA 92093-  
12 0436 USA.

13

14 \* Corresponding author

15 \*\* Current affiliation: NASA Ames Research Center, Moffett Field, CA 94035 USA.

## 16 Abstract

17 The maximization of lipid productivity in microalgae is crucial for the biofuel industry, and it can  
18 be achieved by manipulating their metabolism. However, little efforts have been made to apply  
19 metabolic models in a dynamic framework to predict possible outcomes to scenarios observed at  
20 an industrial scale. Here, we present a dynamic framework for the simulation of large-scale  
21 photobioreactors. The framework was generated by merging the genome-scale metabolic model  
22 of *Chlorella vulgaris* (iCZ843) with reactor-scale parameters, thus yielding a multiscale model.  
23 This multiscale model was employed to predict the sensitivity of growth and composition variation  
24 of *C. vulgaris* on light and nitrogen levels. Simulations of lipid accumulation quantified the  
25 tradeoff between growth and lipid biosynthesis under nitrogen limitation. Moreover, our modeling  
26 approach quantitatively predicted the dependence of microalgal metabolism on light intensity and  
27 circadian oscillations. Finally, we use the model to design a reactor irradiance profile that  
28 maximized lipid accumulation, thus achieving a lipid productivity increase of 46% at a constant  
29 intensity of  $966 \mu\text{E m}^{-2} \text{s}^{-1}$ . Our modeling framework elucidated how metabolism and external  
30 factors can be combined to predict optimized parameters for industrial applications.

31 *Key words* – Photobioreactor, reactor design and optimization, microalgae, *Chlorella vulgaris*,  
32 genome-scale metabolic modeling, kinetic modeling, multiscale modeling.

## 33 Background

34 Microalgae are unicellular photosynthetic organisms that fix carbon dioxide (CO<sub>2</sub>) in presence of  
35 light to obtain energy and synthesize necessary metabolic precursors for growth. Carbon fixation  
36 of microalgae can be up to ten times higher than that of plants [1,2] and accounts for about 40%

37 of the Earth's CO<sub>2</sub> fixation [3]. Their powerful photosynthetic activity caused microalgae to be a  
38 focus of research in ecology, systems biology, and bioengineering.

39 Oleaginous microalgae are able to store lipids at levels higher than 20% w/w, which is the  
40 minimum threshold for profitable production of biofuels [4,5]. *Chlorella vulgaris* has drawn  
41 widespread attention, as it can intracellularly concentrate up to 50% w/w of lipids in form of  
42 triacylglycerols (TAGs) [6]. Since TAGs serve as main precursors for biofuel production, *C.*  
43 *vulgaris* is a promising lipid producer with potential application at industrial scale. However,  
44 studies about lipid accumulation have shown that stress conditions trigger lipids accumulation at  
45 the expense of decreased growth rate [6,7]. At the industrial scale, reactor lipid productivities are  
46 severely limited by this tradeoff, rendering the study of the interwoven connection among  
47 metabolic and physical drivers of lipid biosynthesis as a field of great significance and research  
48 focus. Different efforts have been made towards manipulating microalgae metabolism, mainly by  
49 varying light, nitrogen, and growth conditions [8]. Nonetheless, the maximization of lipid  
50 productivity in microalgae has remained a challenge for years, due to experimentation being  
51 extremely time- and resource-intensive. Therefore, computational tools appear as a promising  
52 alternative, since they can assess optimal growth conditions time- and cost-effectively.

53 To date, all but one study on dynamic modeling of the growth of *C. vulgaris* have been based on  
54 kinetic modeling [2,9–17]. All kinetic models are based on a black-box framework. That is, their  
55 primary focus is fitting experimental data regardless of the structure of underlying phenomena.  
56 These models have been crucial for the development of the chemical and biochemical industry  
57 [18]; however, a more robust approach is necessary to predict not only global reactor dynamics,  
58 but also intracellular metabolic capabilities, namely lipid biosynthesis.

59 Microalgal metabolism has been previously studied using genome-scale metabolic (GSM) models,  
60 thus elucidating organelle functionality and pathway coupling, as well as the interactions of  
61 photosynthetic pathways with the rest of the network under different light wavelengths [19,20].  
62 Some studies on microalgae metabolic modeling have incorporated photon uptake [21,22],  
63 enabling process optimization of light intensity and culture density at the laboratory scale [21]. In  
64 recent studies, experimental time-course biomass compositions were incorporated in the GSM  
65 model to predict the metabolic response to nitrogen depletion [23] and to optimize nitrate supply  
66 in *C. vulgaris* [24]. Notably, GSM modeling allowed to assess metabolic crosstalk in a *C. vulgaris*  
67 and *Sacharomyces cerevisiae* synthetic syntrophic community [25]. Though, there exists no  
68 mathematical framework that combines these metabolic models with reactor-scale dynamics for  
69 the prediction of growth of microalgae, such as *C. vulgaris*, at a scale relevant to industrial  
70 applications.

71 Merging mathematical representations of phenomena at the genome and reactor scale would result  
72 in a multiscale model. Separately, each mathematical representation is successful in modeling the  
73 phenomenon they were based upon but cannot individually account for entire reactor dynamics.  
74 For example, a genome-scale metabolic (GSM) network is a powerful tool for understanding  
75 species-specific metabolism. However, without experimental input, a GSM model cannot predict  
76 time-course metabolic changes, as well as reactor-scale growth.

77 Here, we generated a multiscale model that simulates time-course growth and biomass composition  
78 variations using an available GSM model of *C. vulgaris* (*iCZ843*). The model includes light  
79 attenuation and uptake, photoinhibition, nitrogen and carbon uptake kinetics, and carbon allocation  
80 (carbohydrate and lipid accumulation and consumption). We then employed previously reported  
81 experimental growth data under different nitrogen and light conditions to validate our predictions.

82 For the former, we employed data by Adesanya et al. [13] as reference, whereas for the latter we  
83 used data by Kim et al. [14]. As different strains can have different metabolic capabilities, we  
84 performed data regression and validation individually for both cases. Finally, we present the  
85 model's potential for its use in reactor design and optimization by determining light profiles for  
86 maximizing lipid productivity in a photobioreactor.

## 87 Results

### 88 Prediction of growth trends at two different initial nitrogen concentrations

89 So far, dynamic modeling of the growth of *C. vulgaris* has been almost entirely addressed using  
90 kinetic modeling (Table 1). However, this type of modeling lacks the ability to include the effect  
91 of reactor-scale dynamics on microalgal metabolism. Moreover, no model has accounted for the  
92 combined effect of nutrient uptake, circadian oscillations, and light attenuation on the dynamic  
93 growth and biomass composition of microalgae.

94 **Table 1. Existing models for the growth of *Chlorella vulgaris*. Early models focused on dynamic**  
95 **modeling through black-box methods.**

| Study (Year)                 | Model characteristics* |   |    |    |    |    |    |    |    |
|------------------------------|------------------------|---|----|----|----|----|----|----|----|
|                              | Type                   | D | CU | NU | LD | LU | CO | LA | SA |
| Iehana (1990) [9]            | K                      | ✓ |    |    |    |    |    |    |    |
| Wijanarko et al. (2004) [10] | K                      | ✓ | ✓  |    |    |    |    |    |    |
| Filali et al. (2011) [11]    | K                      | ✓ | ✓  |    |    | ✓  |    |    |    |
| Concas et al. (2013) [12]    | K                      | ✓ | ✓  |    | ✓  | ✓  | ✓  |    |    |

|                                           |    |   |   |   |   |   |   |   |   |
|-------------------------------------------|----|---|---|---|---|---|---|---|---|
| Adesanya et al. (2014) [13]               | K  | ✓ | ✓ | ✓ | ✓ | ✓ |   | ✓ |   |
| Kim et al. (2015) [14]                    | K  | ✓ |   |   | ✓ | ✓ |   |   |   |
| Sakarika et al. (2016) [15]               | K  | ✓ | ✓ |   |   |   |   | ✓ |   |
| Adamczyk et al. (2016) [2]                | K  | ✓ | ✓ |   |   |   |   |   |   |
| Chan et al. (2016) [16]                   | K  | ✓ | ✓ |   |   | ✓ |   |   |   |
| Zuñiga et al. (2016) [20]                 | GS |   | ✓ | ✓ |   | ✓ |   |   |   |
| Zuñiga et al. (2017) [6]                  | GS | ✓ | ✓ | ✓ |   | ✓ |   |   |   |
| Mansouri et al. (2017) [17]               | K  | ✓ |   |   |   |   |   |   |   |
| Chien-Ting Li (2019)                      | GS | ✓ | ✓ | ✓ | ✓ |   |   | ✓ |   |
| Tibocha-Bonilla et al. (2020, this study) | MS | ✓ | ✓ | ✓ | ✓ | ✓ | ✓ | ✓ | ✓ |

96 Since these methods could not account for the underlying biochemistry of the cell, high complexity models  
 97 were not possible. With the generation of a GSM model for *C. vulgaris*, it was possible to create a multiscale  
 98 model that accounts for both reactor dynamics and their impact in the phenotype of the cell.

99 \* Model characteristics are abbreviated as follows: dynamic (D), carbon uptake (CU), nitrogen uptake (NU),  
 100 light distribution (LD), light uptake (LU), circadian oscillations (CO), lipid accumulation (LA) and starch  
 101 accumulation (SA). Models were classified into three types: kinetic (K), genome-scale (GS) and multiscale  
 102 (MS).

103 We generate a multiscale model capable of predicting this interaction by merging different  
 104 mathematical representations (or modules, see Fig 1A) of biological and reactor dynamics at  
 105 different scales. Nitrogen availability has been identified as one of the most important drivers of  
 106 microalgal growth, as it has a profound impact on the cellular phenotype of phototrophs [6]. To  
 107 validate our model's sensitivity to varying nitrogen concentration, we contrasted predictions of

108 our model to experimental data reported in a kinetic study by Adesanya et al., in which *C. vulgaris*  
 109 was cultivated under two different initial nitrogen concentrations (first scenario: 0.021 g L<sup>-1</sup>,  
 110 second scenario: 0.124 g L<sup>-1</sup>) and macromolecular cellular contents were recorded [13] (markers  
 111 in Fig 1B-E).

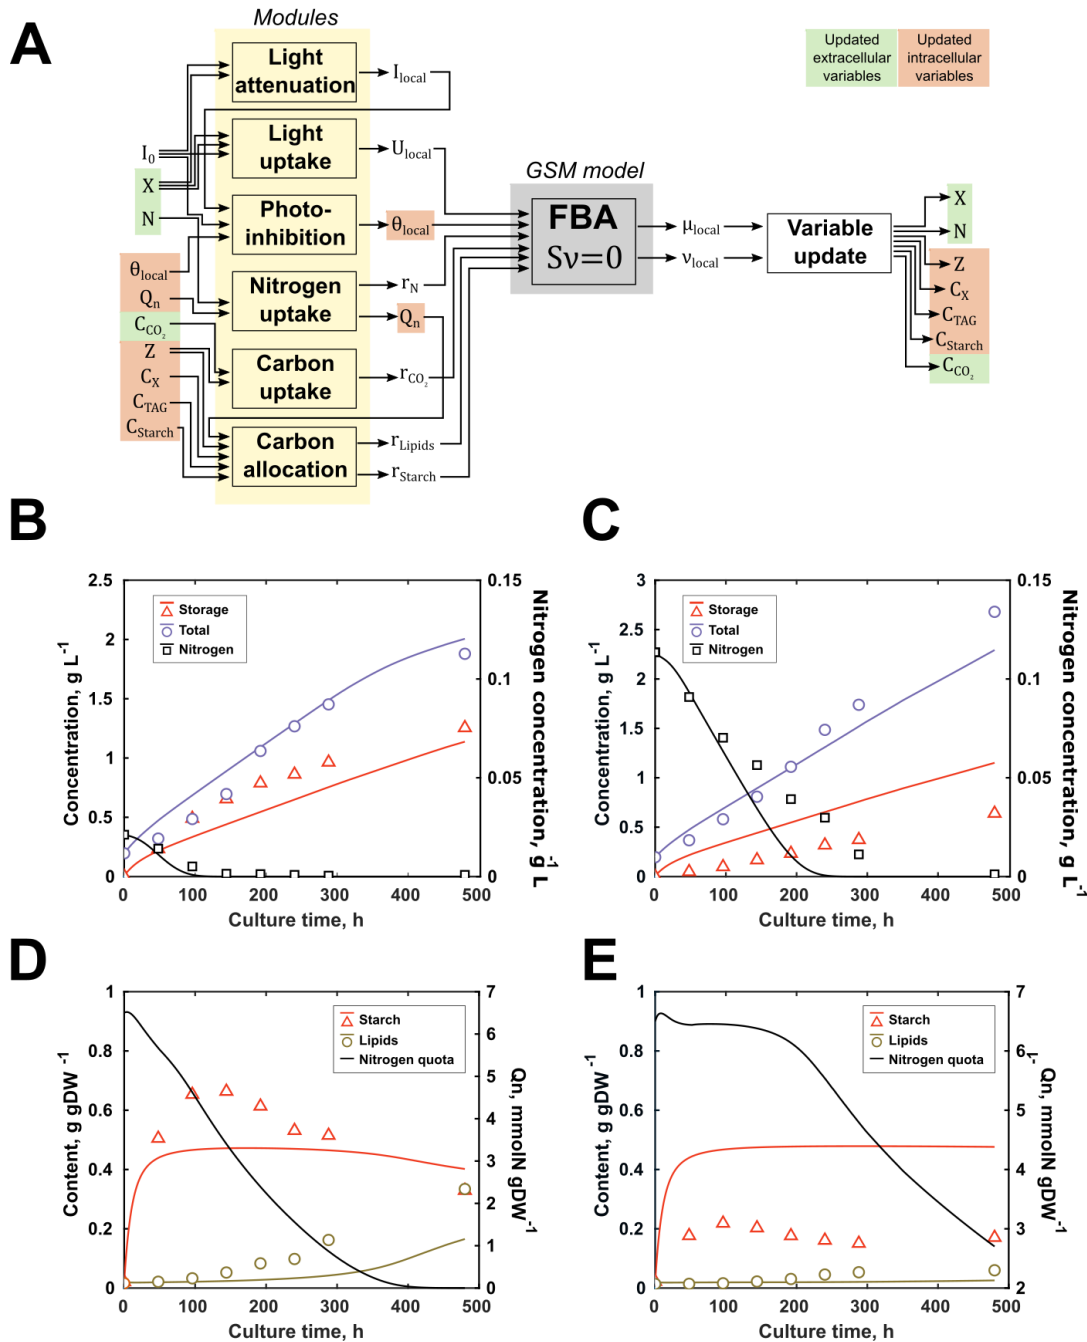

113 **Fig 1. Simulated and reported data of *Chlorella vulgaris* at two different initial nitrogen**  
114 **concentrations.**

115 (A) Schematic representation of the numerical algorithm employed in this work for a single timestep and  
116 light interval (see *Methods*). (B) and (D) correspond to the experiment with an initial nitrogen concentration  
117 of 0.021 g L<sup>-1</sup>, while (C) and (E) were recorded under one of 0.124 g L<sup>-1</sup>. All experiments were reported  
118 and simulated under a continuous irradiance of 80 μE m<sup>-2</sup> s<sup>-1</sup>. Continuous lines and markers represent  
119 predicted data by our model and reported data by Adesanya et al. [13], respectively.

120 We used the first scenario, with an initial nitrogen concentration of 0.021 g L<sup>-1</sup> (Fig 1B & D) for  
121 the calculation of strain-specific parameters (shown in Table S1) and simulated a second scenario  
122 (Fig 1C & E) to test for predictive capability. In this scenario, a relatively low initial nitrogen  
123 concentration in the media (half that of standard BBM medium [26]) caused the size of the internal  
124 nitrogen pool to decrease steadily throughout the culture duration (Fig 1D). Since the microalga  
125 was not able to replenish its nitrogen reserves, lipid accumulation was triggered 100 h after  
126 nitrogen was depleted from the medium.

127 As shown in Fig 1C, under the growth conditions of the second scenario, nitrogen availability was  
128 increased six-fold. Though there were some quantitative differences regarding the starch content  
129 of *C. vulgaris*, our model was able to capture the overall trends. Our simulations show that a  
130 significant increase in the nitrogen availability allowed the microalga to replenish its nitrogen  
131 reserves for the first 200 h and caused it to deplete nitrogen from the medium 130 h later than the  
132 first scenario (Fig 1E).

133 The model was able to capture the almost complete inactivation of the lipid metabolism due to this  
134 nitrogen availability. However, despite there being almost no lipid accumulation and high nitrogen  
135 levels, the predicted growth rate was only amplified from an average of 0.0032 to 0.0038 h<sup>-1</sup> (19%  
136 increase), similar to an experimentally determined increase of 15%.



## 137 **Simulation at different light intensities**

138 We accounted for spatial light distributions, as energy metabolism is sharply hindered for cells  
139 further away from the light source, especially in larger-scale vessels. In addition, we included the  
140 modeling of photoinhibition, since it restricts the maximum amount of light a culture can be  
141 subjected to and the duration of exposure. Although several species have been shown to adapt to  
142 high light conditions in the long term [27,28], photoinhibition still significantly diminishes the  
143 growth capability of phototrophs [29–31], and specifically of *C. vulgaris* above  $2400 \mu\text{E m}^{-2} \text{s}^{-1}$   
144 [32]. According to previous reports, electron transfer through the photosystems is controlled by  
145 the fraction of active protein D1 of the photosystem II (PSII). Therefore, we used the model  
146 proposed by Baroli et al. [30] to determine the fraction of active D1 protein as a means to penalize  
147 the effective photon input to the metabolic network.

148 We employed previously reported data to validate the model's sensitivity to change in light  
149 intensities. Kim et al. [14] cultured *C. vulgaris* at six different irradiances and monitored biomass  
150 concentration throughout the timespan of the culture. We used data recorded at  $848 \mu\text{E m}^{-2} \text{s}^{-1}$   
151 for the regression of parameters (Fig 2), while data at 30, 55, 80, 197, and  $476 \mu\text{E m}^{-2} \text{s}^{-1}$  were  
152 employed for model validation.

153 Experimental total biomass concentrations were recapitulated by our model. Even though  
154 intracellular concentrations were not measured by Kim et al. [14], the model could be used to  
155 hypothesize microscopic and macroscopic phenomena that lay underneath, e.g. circadian clock  
156 oscillations, carbon allocation and responses to nitrogen depletion. As opposed to the case of  
157 Adesanya et al. [13], our simulations showed that an elevated irradiance of  $848 \frac{\mu\text{E}}{\text{m}^2\text{s}}$  made  
158 impossible for the microalga to maintain the intracellular nitrogen levels after the nitrogen was

159 depleted from the medium at 100 h. This caused the lipid production to be triggered around the  
160 same time point, as intracellular nitrogen levels were already decreasing sharply (Fig 2B).

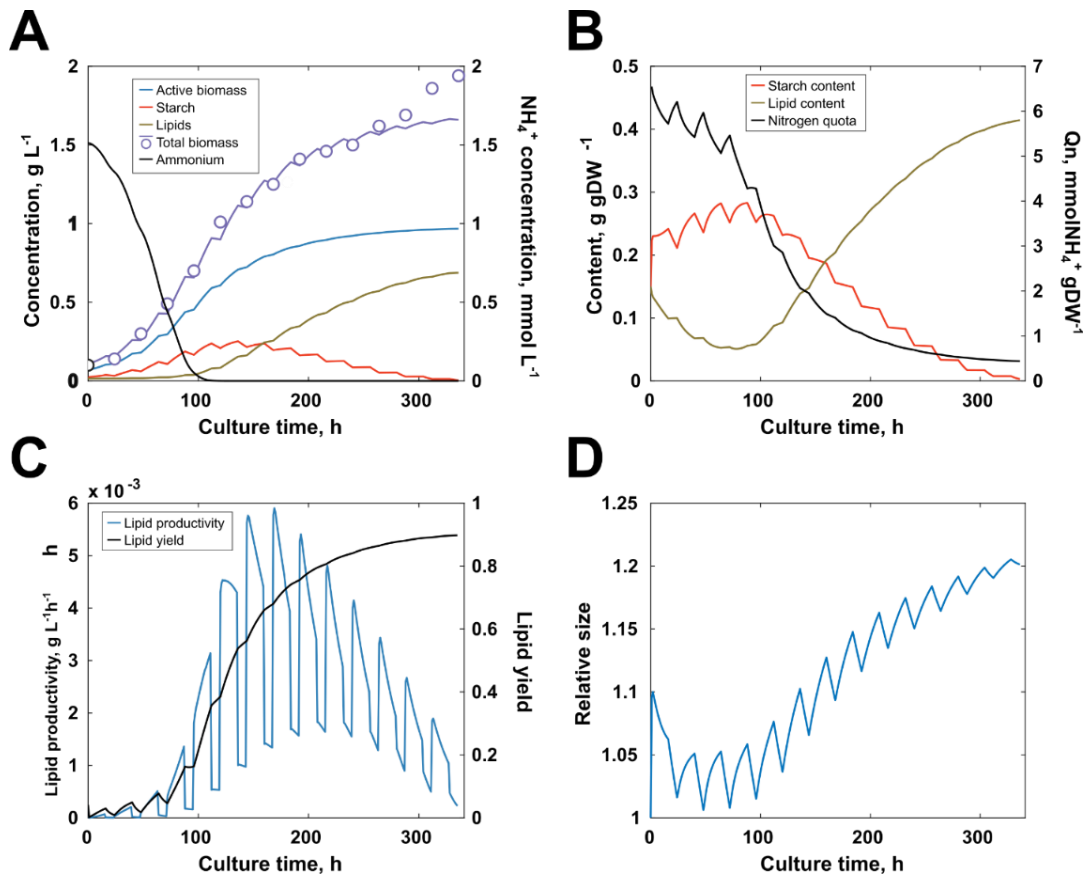

161

162 **Fig 2. Contrast of calculations and reported data at 848 μE m<sup>-2</sup> s<sup>-1</sup> by Kim et al [14].**

163 (A) Global reactor concentrations of active (non-storage) biomass, starch, lipids, total biomass and nitrate  
164 contrasted with reported data of total biomass. (B) Intracellular content of starch, lipids and nitrogen. (C)  
165 Contrast of lipid productivity with lipid yield (% of carbon input directed to lipid production). (D) Variation  
166 of cell size. Continuous lines and markers represent predicted data by our model and reported data,  
167 respectively.

168 According to our simulations, the optimum lipid productivity was achieved shortly after nitrogen  
169 was consumed from the medium but rapidly decreased afterward (Fig 2C). Interestingly, even  
170 though nitrogen depletion from the medium was achieved at 100 h, peak global lipid productivity

171 of the photobioreactor took place at 168 h, when internal reserves were running low but were not  
172 yet depleted. Overall lipid productivity decreased steadily for the following 167 h, as growth was  
173 increasingly hindered by internal nitrogen depletion and the cell size was reaching its limit.

174 Our simulations predicted cell size change as a result of light/dark cycles and long-term nitrogen  
175 depletion (Fig 2D). In general, during the light period, the cell focuses on the accumulation of  
176 starch for later use under dark conditions, causing its size to increase. The opposite behavior occurs  
177 during the dark period, in which starch is consumed for maintenance and growth. In the long term,  
178 nitrogen depletion-induced lipid accumulation yielded bigger cells at the late stage.

179 Simulations successfully reproduced growth behavior in the photobioreactor at different irradiance  
180 conditions (Fig 3). Even though they underestimated biomass production at low intensities, the  
181 overall growth trends were predicted accurately. Since shading hampers the ability to fix inorganic  
182 carbon, the slope of the growth curves decreased with lower irradiances. At higher intensities, it is  
183 evident that an increase from 476 to 848  $\mu\text{E m}^{-2} \text{s}^{-1}$  did not signify an improvement in the overall  
184 culture growth. Our simulations show that this was a consequence of a combined effect of shading,  
185 photoinhibition and nitrogen limitation.

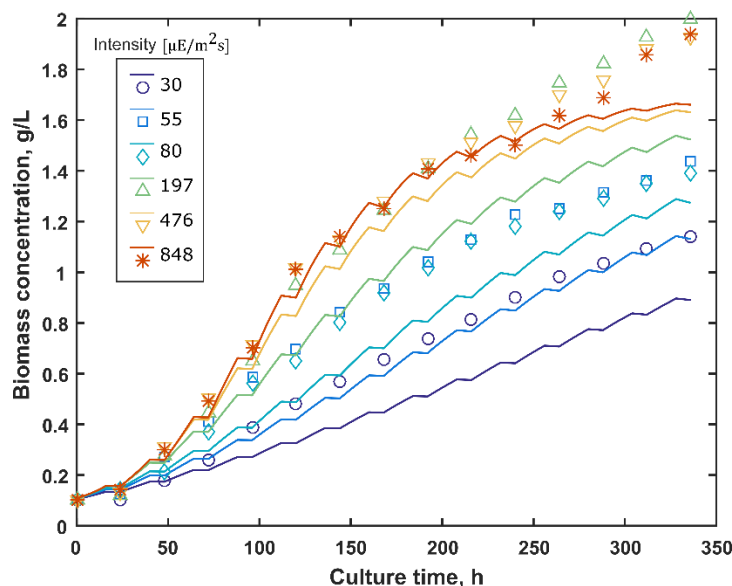

186

187 **Fig 3. Growth simulation and experimental validation for different irradiance conditions reported**  
188 **by Kim et al. [14] at.**

189 Lines represent model simulations while markers show reported experimental data. Even though the model  
190 underestimated growth at low intensities, growth rate response to varying light intensities was captured by  
191 the model.

### 192 **Optimization of the lipid productivity in a photobioreactor**

193 In order to illustrate the model's aptitude for process design and optimization, we predicted the  
194 optimal light strategy to maximize lipid productivity in a stirred tank photobioreactor reactor with  
195 six internal radially distributed fluorescent lamps.

196 In brief, five variables were manipulated to search for the optimal global lipid productivity  
197 condition: lamp irradiance at time zero  $I_0$ , lamp irradiance at the end of the culture  $I_f$ , photoperiod  
198  $p$ , culture duration  $t_f$ , and shape of irradiance temporal profile (see *Methods*) represented by the  
199 coefficient  $b_I$ . A hypothetical base case was given to the model as the initial condition of the  
200 optimization, with an irradiance profile within the typical values previously used for experimental

201 optimization of lipid accumulation [29]. Fig S3 shows a summary of the simulation results of the  
202 base case, and Table 2 summarizes the base case and optimized values of the manipulated  
203 variables.

204 **Table 2. Initial and final values of the manipulated variables of the optimization.**

|           | $I_0$<br>$\mu\text{E m}^{-2} \text{s}^{-1}$ | $I_f$<br>$\mu\text{E m}^{-2} \text{s}^{-1}$ | $p$<br>$h$ | $t_f$<br>$h$ | $b_f$ |
|-----------|---------------------------------------------|---------------------------------------------|------------|--------------|-------|
| Base case | 400                                         | 600                                         | 16         | 300          | 0.5   |
| Optimized | 966                                         | 966                                         | 17         | 374          | 0.0   |

205 Our model predicted an optimum constant irradiance of  $966 \mu\text{E m}^{-2} \text{s}^{-1}$ . As shown in Fig 4, this  
206 light intensity improves the final biomass concentration from 1.70 to 1.83 g/L in 374 h, which is  
207 roughly a 7% increase in biomass, and 46% increase in final lipid concentration, for a 25% longer  
208 culture timespan.

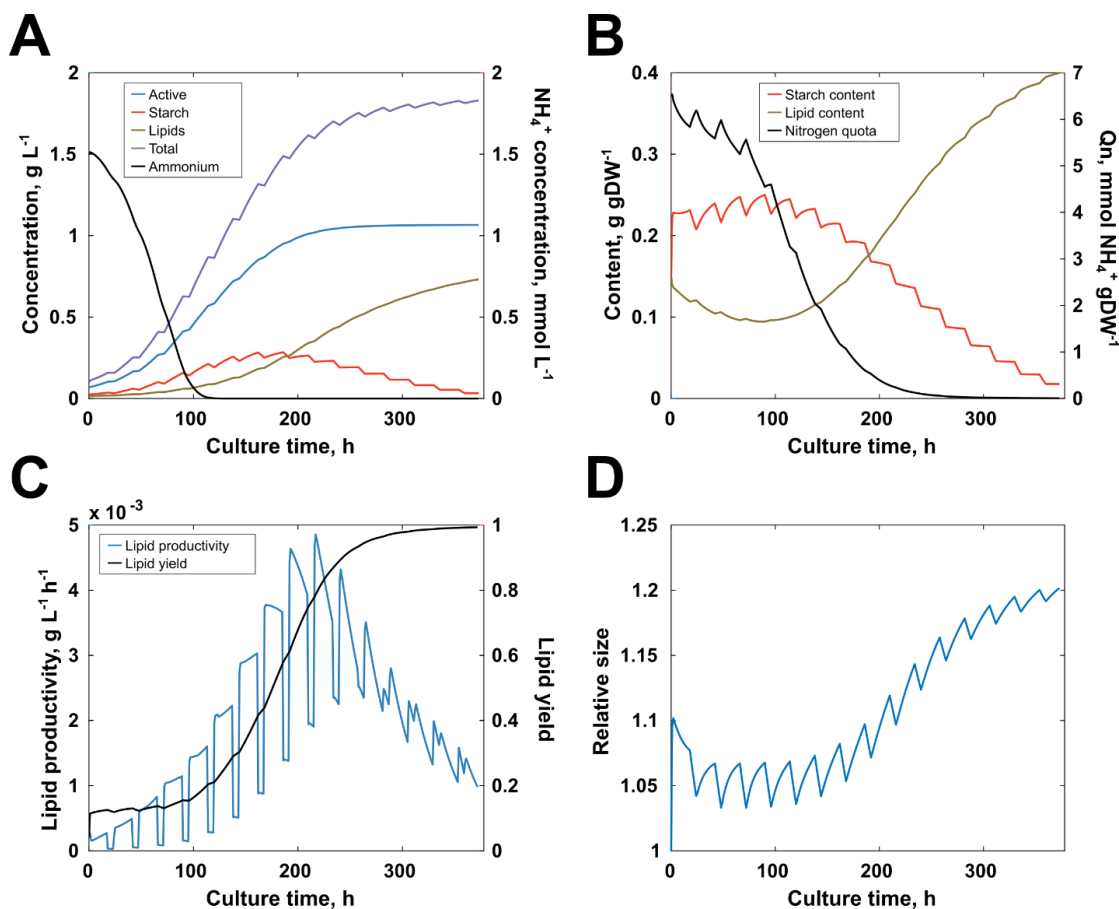

209

210 **Fig 4. Simulation results of lipid productivity maximization by varying light strategy, photoperiod**  
211 **and culture time.**

212 (A) Resulting optimal global reactor concentrations of active biomass, starch, lipids, total biomass and  
213 nitrate contrasted. (B) Intracellular content of starch, lipids and nitrogen. (C) Lipid productivity and lipid  
214 yield (% of carbon input directed to lipid production). (D) Variation of cell size.

215 Even though at the early stage of (0 – 100 h) a fraction of the culture is subjected to an irradiance  
216 of around 3,000  $\mu\text{E m}^{-2} \text{s}^{-1}$  (Fig 4), a large portion of it is under a much lower but still significant  
217 irradiance of 200  $\mu\text{E m}^{-2} \text{s}^{-1}$ . This, along with high nitrogen availability, favored higher growth  
218 rates in such a way that photoinhibition was compensated. Moreover, the optimization showed that  
219 a photoperiod of 17:7 is sufficient to satisfy dark period metabolic requirements without negatively  
220 affecting growth or lipid productivity.

221 As early as 25 h into the culture, the highest irradiance inside the culture lowers to 2400  
222  $\mu\text{E m}^{-2} \text{s}^{-1}$ . During the medium-growth stage (100 - 200 h) shading rapidly diminished  
223 photoinhibition from approximately 80% to 25%, as highest irradiances were of only 800  
224  $\mu\text{E m}^{-2} \text{s}^{-1}$ , and the average dropped to 200  $\mu\text{E m}^{-2} \text{s}^{-1}$ .

225 At the low-growth stage (200+ h), shading is so substantial that the average irradiance drops to  
226 142  $\mu\text{E m}^{-2} \text{s}^{-1}$  and stabilizes there for the rest of the culture. Moreover, as exhibited in Fig 5, at  
227 this point light uptake had almost halted throughout the majority of the reactor, with an average  
228 photon uptake of only 70  $\text{mmol gDW}^{-1} \text{h}^{-1}$ , as opposed to an average of 1000  $\text{mmol gDW}^{-1} \text{h}^{-1}$   
229 at the high-growth stage.

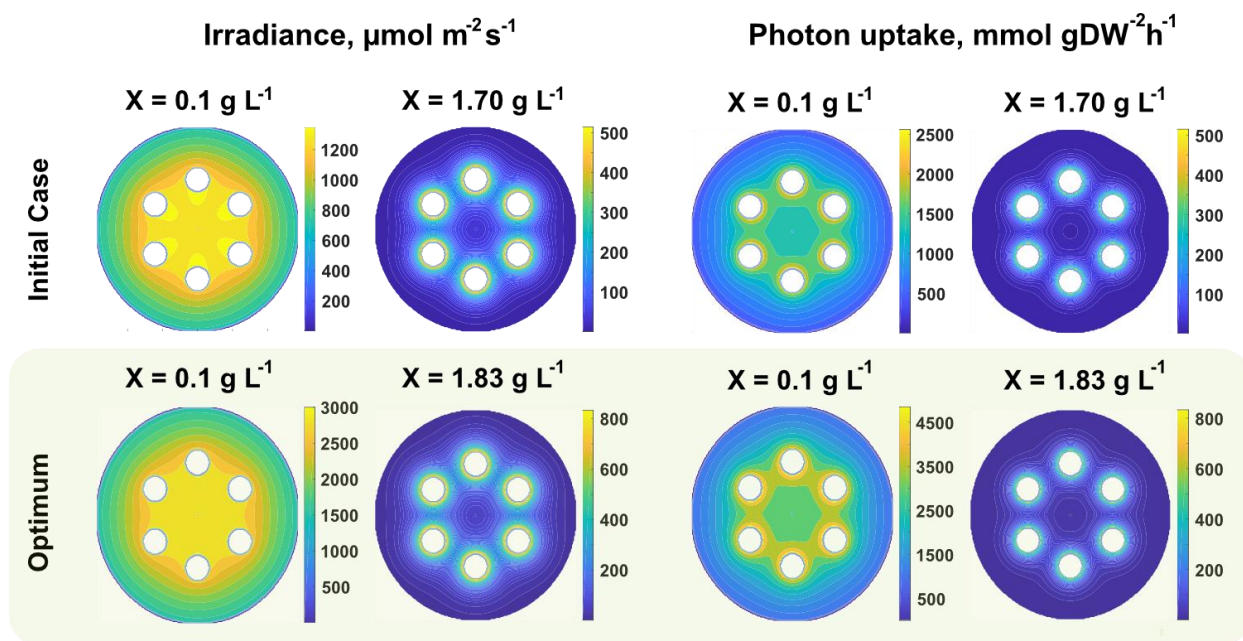

230

231 **Fig 5. Light and photon uptake distributions at the beginning and end of the culture.**

232 Internal cross-section distributions in the bioreactor are shown for the initial and optimum cases, at the  
233 initial and final concentration. Distributions shown correspond to light intensity (irradiance) and photon  
234 uptake. (Top row) Distributions for the initial case. (Bottom row) Distributions for the found optimum  
235 condition.

## 236 Discussion

### 237 **The multiscale model accurately predicts dynamic growth and biomass breakdown**

238 In this work, we generated a multiscale metabolic model that predicts the growth dynamics of  
239 *Chlorella vulgaris*, by coupling mathematical representations for circadian oscillations, substrate  
240 uptake, photoinhibition and light uptake distributions. Kinetics-based dynamic metabolic  
241 modeling has already been conceived [33,34], but only Jeong et al. [35] have applied it on a  
242 complete metabolic network, and one study on a sub-network [36]. Moreover, neither study  
243 accounted for time-dependent carbon allocation or light uptake distributions.

244 First, we used the reported growth kinetics by Adesanya et al. [13] at two different initial nitrogen  
245 concentrations to test the model's ability to capture differential reactor behavior when nitrogen  
246 availability changed. In the first scenario, the microalga was subjected to a relatively low nitrogen  
247 availability, thus reducing its uptake rate, and preventing it from replenishing its nitrogen reserves.  
248 Consequently, lipid accumulation was triggered after nitrogen was depleted in the medium;  
249 however, its activation was not significant until days later. This implies that nitrogen depletion  
250 from the medium signifies the beginning of the end of exponential growth, rather than the end  
251 itself. A similar behavior was obtained by Mansouri et al. [17] under a comparable setup. They  
252 reported that exponential growth was maintained for the first 96 h of growth, time after which  
253 growth gradually stopped until their last recorded instance at 168 h.

254 A second scenario was tested in which the microalga was cultured with a six-fold increase in initial  
255 nitrogen concentration. As expected, lipid accumulation dramatically decreased in both their report  
256 and our predictions, but growth did not increase significantly (19 %). Experimental and predicted  
257 growth rates remained one order of magnitude lower than previously reported maximum growth



258 rates of 0.039 [6] and 0.033 h<sup>-1</sup> [14,17]. Our simulations show that this was mainly caused by the  
259 comparatively reduced irradiance as opposed to common working irradiances of 648 [6,20], 20 –  
260 1400 [37], and 30 – 848 [14] μE m<sup>-2</sup> s<sup>-1</sup>. Low light irradiance hindered the overall growth rate  
261 of the microalga, which, in addition to its higher nitrogen availability, allowed it to replenish its  
262 nitrogen reserves for the most part of the culture. This relatively nitrogen-replete condition caused  
263 storage molecule (lipid and starch) production to drop and rendered lipid accumulation almost  
264 non-present.

265 A visible over-estimation of starch content in the second scenario was mainly caused by the  
266 prioritization of starch consumption in the dark period of the topology of our carbon allocation  
267 algorithm (Fig S2), which induces error when trying to predict a permanently illuminated culture,  
268 as used by Adesanya et al. [13]. Further work on the generation of a multiscale model for the  
269 mixotrophic growth of *C. vulgaris* will be necessary for this model to properly include starch  
270 consumption in the light period, with quantitative accounting of carbon allocation and the  
271 differential destination of carbon with concomitant starch breakdown and carbon dioxide  
272 consumption.

### 273 **Light intensity drives oscillations in biomass components and cell size**

274 As a next step, we used reported data by Kim et al. [14] to show the model's capability to predict  
275 the effect of varying the light intensity. Our model was able to reproduce the experimental data  
276 and gave insight into the phenomena that caused the growth trends. For example, circadian clock  
277 oscillations are evident in all monitored variables. Fig 2B shows the starch accumulation-  
278 consumption cycles, along with a macroscopic interchange of carbon flow between starch and  
279 lipids after nitrogen depletion. This behavior has previously been quantitatively determined for

280 other oleaginous microalgae, such as *Synechococcus elongatus* [38], *Chlorella sorokoniana* [39]  
281 and *Dunalliella salina* [40]. In one study, *S. elongatus* exhibited a peak in ADP-glucose  
282 pyrophosphorylase activity, as well as in glycerol-3-phosphate (G3P) production from ribulose  
283 biphosphate (RuBP) coming from the reductive pentose-phosphate pathway (PPP) close to dawn,  
284 implying high starch production in the light period [38]. The same study found the exact opposite  
285 behavior in the dark, with peak activities of glycogen debranching enzyme (glgX).

286 The light-induced storage-consumption cycle is visible in the cell size variations through time,  
287 where cells can be expected to increase in size in the light while storing starch and do the opposite  
288 in the dark, as previously reported by Martins et al. for the cyanobacterium *Synechococcus*  
289 *elongatus* [41]. Furthermore, our simulations captured the well-known tradeoff behavior between  
290 specific lipid biosynthesis and growth rate, which causes the long-term cell size increase after  
291 nitrogen depletion.

### 292 **The model can be used to design light strategies for increased lipid productivity**

293 We used the model to maximize the lipid productivity in a case of study to illustrate its potential  
294 for reactor design and optimization. As opposed to previous trials on light strategies, in which  
295 irradiance increases in a stair-step fashion [29], the model predicted an optimal global light  
296 productivity at a constant lamp irradiance of  $966 \mu\text{E m}^{-2} \text{s}^{-1}$ . At this irradiance lipid productivity  
297 was predicted to increase in 46 %, despite global biomass concentration increasing by only 7%.

298 Even though the optimal irradiance is relatively high, extreme values are only reached at the early  
299 stage of culture, during which high nitrogen availability favored higher growth rates in such a way  
300 that photoinhibition was compensated. Moreover, during the first day of culture the highest

301 irradiance inside the culture lowered to  $2400 \mu\text{E m}^{-2} \text{s}^{-1}$ , which, according to Pfendler et al. [32],  
302 is the limit above which photoinhibition seriously reduces light uptake and growth in *C. vulgaris*.  
303 At the late stage, shading protects most of the cells from excessive irradiances and keeps it at a  
304 level that still favors metabolic activity. At this point, increasing the irradiance of the lamps would  
305 hardly alter the global light availability and uptake, but would critically increase irradiance in the  
306 vicinity of the lamps, where nitrogen-deplete microalgae are no longer capable of compensating  
307 for photoinhibition. This means that, for this case, an individual lamp irradiance of  $966 \mu\text{E m}^{-2} \text{s}^{-1}$   
308 is high enough to boost growth without excessively hindering photon uptake at all culture stages.  
309 As a result, this irradiance is optimal for overall growth and lipid production in the photobioreactor.  
310 In addition, it is worth noting that our model does not yet include neither the modeling of heat  
311 transfer mechanisms between the lamps, medium and surroundings, nor mixing phenomena which  
312 causes it to assume every cell is subjected to the same temperature. With this, the suggested  
313 optimum is only attainable under a cooling system that is efficient enough to maintain overall  
314 temperature between  $22 - 26 \text{ }^\circ\text{C}$  [42].

## 315 Conclusions

316 Modeling of microalgal growth is key for the industrial production of biofuels, as it allows for the  
317 design and optimization at a reactor- and whole plant-level. For this purpose, it is necessary to  
318 generate a framework including accurate accounting of phenomena at every relevant scale, namely  
319 at the genome scale and reactor scale. In this work, combined a GSM network with mathematical  
320 representations of circadian oscillations, nutrient uptake and light distributions, which yielded a  
321 comprehensive multiscale model of the growth dynamics of *Chlorella vulgaris*. We included a  
322 detailed framework for the calculation of photon uptake at different irradiances, by considering

323 light attenuation and photoinhibition. The model was tested both at different nitrogen levels and  
324 light irradiances, rendering it capable of being used for the prediction of specific conditions that  
325 maximize lipid productivity.

## 326 Methods

327 All simulations were carried out within the MATLAB 2016b (MathWorks Inc.) environment and  
328 using the COBRA Toolbox v3.0 [43]. Dynamic Flux Balance Analysis (dFBA) was used for time-  
329 course flux distribution calculations and concentration updates, and GUROBI 7.5.2 was employed  
330 as the solver for the linear optimization problems. A more detailed explanation of the model's  
331 algorithms is shown in this section.

### 332 **The multiscale metabolic model**

333 At the core of our calculations lies the genome-scale metabolic model of the oleaginous microalga  
334 *Chlorella vulgaris*: *iCZ843* [20], with previously proposed modifications for both heterotrophic  
335 and autotrophic growth [6,20]. Overall, the GSM was solved using COBRA Toolbox (dFBA) for  
336 metabolic flux distributions. In addition, a set of additional models were included to account for  
337 secondary phenomena which constrained the solution space of the Linear Programming (LP)  
338 system (GSM in Fig 1A). Phenomena were included according to previous reports of specific  
339 physical and physiological mechanisms significantly affecting growth. Included mechanisms were  
340 light attenuation, light uptake, photoinhibition, nitrogen and carbon uptake kinetics, and carbon  
341 allocation (carbohydrate and lipid accumulation and consumption). Mixing, heat and mass transfer  
342 phenomena were not included in the present model. A simplified representation of the general  
343 numerical algorithm is presented in Fig 1A.

## 344 **Light attenuation**

345 Several studies have focused on light attenuation of microalgae [44–49], with a few solely on  
346 *Chlorella vulgaris* [44,45]. In this work, we decided to use the model for light absorption and  
347 scattering proposed by Naderi et al. [45], which enabled accurate predictions of light distribution  
348 at low and high cell densities. The intensity profile function is shown in Eq. (1).

$$I(r, X) = I_0 \exp\left(-r \cdot K_a \cdot X \frac{r^w}{p_k + r^w}\right) \quad (1)$$

349 For internally illuminated reactors, the distance  $r$  was computed as the distance between the edge  
350 of the light source and any given point inside the culture. Several internal sources were accounted  
351 for by taking the sum of the calculated individual light distributions. For externally illuminated  
352 (jacketed) reactors  $r$  was calculated as the distance between the illuminated edge of the reactor and  
353 any given point inside the culture.  $K_a$  represents the absorption coefficient and is a function of the  
354 biomass concentration  $X$  and the maximum absorption coefficient  $K_{a,max}$ , as shown in Eq. (2). In  
355 addition,  $p_k$ ,  $b$  and  $w$  are model parameters.

$$K_a(X) = \frac{K_{a,max}}{b + X} \quad (2)$$

356 The initial intensity  $I_0$  corresponds to either the nominal or measured intensity of the light source,  
357 whichever was reported in the studies. Absorption and scattering coefficients were left unchanged  
358 throughout the culture time, although further studies can compute time-specific coefficients from  
359 absorption spectrum data [21].

360 For increased computation speed, we divided the photobioreactor in a finite number of zones with  
361 the same light intensity and calculated the overall reaction rates as a volume-weighted average of  
362 the individual intervals. The number of light intervals ( $N_l$ ) were determined in a logarithmic

363 fashion, as shown in Eq. (3). Mesh dependence analyses showed that 10 active (with non-zero  
364 irradiance) intervals were enough for the simulations to be independent of the number of intervals.

$$I_i = 10 \left( I_{\min} + \frac{(I_{\max} - I_{\min}) \cdot i}{N_I} \right) \quad \forall i \in \{1, \dots, N_I\} \quad (3)$$

### 365 **Light uptake**

366 We defined a photon conservation balance over a differential element (Fig S1) to account for  
367 spatial light uptake distribution, as shown in Eq. (4).

$$(I A)_r - (I A)_{r+\Delta r} = U X \Delta V \quad (4)$$

368 The conservation balance is readily converted to the differential equation shown in Eq. (5), and a  
369 cellular uptake profile (U) is obtained in Eq. (6). The magnitude U is at this point a unit-consistent  
370 input to the GSM model of the microalga, which represents the upper bound of specific photon  
371 uptake rate.

$$\frac{\partial I}{\partial r} + \frac{1}{r} I + U X = 0 \quad (5)$$

$$U(r, X) = -\frac{1}{X} \cdot \left[ \frac{\partial I}{\partial r} + \frac{1}{r} I \right] \quad (6)$$

372 A similar procedure for a planar reactor yields the homologous expression shown in Eq. (7) .

$$U(r, X) = -\frac{1}{X} \frac{\partial I}{\partial r} \quad (7)$$

### 373 **Photoinhibition**

374 Photoinhibition is the reduction of photosynthetic capacity in photoautotrophic organisms [50],  
375 and has been proven to be controlled by the photodamage – repair dynamics of the protein D1 of

376 the photosystem II (PSII) [31,50]. Consequently, an accurate account of the fraction of available  
377 photons that reach the metabolic network can be performed by determining the fraction of active  
378 protein D1. Therefore, the effect of photoinhibition in the model was represented by the fraction  
379 of active D1, employing the model by Han [50], with the coefficients reported by Baroli et al. [30]  
380 (see Eqs. (8) and (9)). The magnitude  $\theta$  represented the fraction of photons that were used by the  
381 metabolic network, and is a function of time  $t$ , the first-order D1 photorepair and photodamage  
382 coefficients,  $k_r$  and  $k_d$ , and light intensity  $I$ . Moreover,  $k_r$  is a function of light intensity, which  
383 follows a linear behavior described by the slope  $m_k$  and intersect  $b_k$ .

$$\frac{d\theta}{dt} = k_r(1 - \theta) - k_d I \theta \quad (8)$$

$$k_d = m_k I + b_k \quad (9)$$

384 At every timestep and light interval, metabolic flux distributions are first calculated assuming  $\theta =$   
385 0. The ideal photon uptake rate is then multiplied by  $\theta$  and set as the new upper boundary for  
386 further calculation steps.

### 387 **Nitrogen and carbon uptake kinetics**

388 The uptake rate of nitrogen  $r_N$  is a function of nitrogen quota ( $Q_n$ ), growth rate  $\mu$ , and extracellular  
389 nitrogen concentration ( $N$ ), as proposed by Adesanya et al. [13] and shown in Eqs. (10) and (11).  
390 Other parameters include: the minimum and maximum nitrogen quotas,  $q_n$  and  $q_{nm}$ , the maximum  
391 nitrogen uptake rate  $v_{nm}$ , and nitrogen uptake half-saturation coefficient  $v_{nh}$ .

$$r_N = \frac{q_{nm} - Q_n}{q_{nm} - q_n} \left[ \frac{v_{nm} N}{N + v_{nh}} \right] \quad (10)$$

392 A simple mass balance on including growth-induced depletion and replenishment yields Eq. (11).

$$\frac{dQ_n}{dt} = r_N - Q_n\mu \quad (11)$$

393 Similarly, we used the inorganic carbon uptake kinetics model proposed by Filali [11] to calculate  
394 the maximum carbon uptake rate  $r_{CO_2}^{max}$  at any given moment, as shown in Eq. (12). In this model,  
395 carbon uptake is a function of the concentration of carbon dioxide  $C_{CO_2}$ , the maximum carbon  
396 uptake rate from the GSM model  $r_{CO_2}^{max,GSM}$ , the minimum cell size  $Z_{min}$ , the size increase  $T$ ,  
397 biomass concentration  $X$ , and carbon uptake half-saturation coefficient  $K_C$ .

$$r_{CO_2}^{max} = r_{CO_2}^{max,GSM} \left( \frac{C_{CO_2}}{C_{CO_2} + K_C * \frac{X}{Z_{min}T}} \right) \quad (12)$$

### 398 **Carbon allocation**

399 Nutrient availability in the media directly alters the way carbon is distributed across the cell.  
400 During nutrient-sufficient conditions, microalgae tend to allocate carbon on amino acid and nucleic  
401 acid biosynthesis (herein *active biomass* or  $X$ ); on the other hand, nutrient-depletion, and in general  
402 stress conditions, causes metabolism to shift carbon flow towards lipid biosynthesis. In  
403 photobioreactors, the nitrogen poses as bottleneck for overall growth, but also as trigger for lipid  
404 accumulation [6,13,17,20,51].

405 We proposed a simple flow distribution algorithm, with cell size ( $Z$ ) and nitrogen quota ( $Q_n$ ) as  
406 coefficients for the estimation of carbon allocation. Increased nitrogen quota favored biosynthesis  
407 of active biomass and starch, whereas low nitrogen levels shifted carbon flow towards lipid  
408 production. We defined a magnitude  $n$ , which played the role of a penalty function on active  
409 biomass production and followed the Michaelis-Menten-type function shown in Eq. (13).



$$n = 1 - \frac{q}{q + q_h} \quad (13)$$

410 Relative intracellular nitrogen levels are represented by  $q = Q_n/q_{nm}$ , and  $q_h$  is the half-saturation  
411 coefficient. In a similar fashion, decreased cell sizes favored the uptake of inorganic carbon and  
412 the accumulation of storage molecules, while bigger cells were assumed to lower carbon uptake  
413 levels, as previously reported by the studies of Taguchi et al. [52] and Thompson et al. [53].  
414 Therefore, we defined a penalty function  $z$  on inorganic carbon uptake, presented in Eq. (14).

$$z = \frac{T - 1}{T_{\max} - 1} \quad (14)$$

415 Where  $T$  is the size increase, calculated as a function of the intracellular content of starch ( $x_{\text{starch}}$ )  
416 and lipids ( $x_{\text{lipid}}$ ), as shown in Eq. (15).

$$T = \frac{1}{1 - x_{\text{starch}} - x_{\text{lipid}}} \quad (15)$$

417 Finally, storage starch consumption is limited by a third penalty function based on the intracellular  
418 starch concentration  $c_{\text{starch}}$  and  $K$  as a half-saturation coefficient.

$$s = \frac{c_{\text{starch}}}{c_{\text{starch}} + K} \quad (16)$$

419 In the end, the penalty functions were used to constrain the solution space of the GSM, as upper  
420 or lower boundaries, as shown in Eq. (17) to (20). Every variable with superscript *max* is internally  
421 calculated in the algorithm as the maximum possible value at any given time point and light  
422 interval. During light and dark periods, the objective functions were, respectively, starch  
423 accumulation and biomass production, following previous reports of peak activities of starch  
424 production and consumption in light and dark periods, respectively [38–40]. An overview of the  
425 carbon allocation algorithm is illustrated in Fig S2.

$$r_{\text{TAG}} = r_{\text{TAG}}^{\text{max}} \cdot n \quad (17)$$

$$r_{\text{CO}_2}^{\text{light}} = r_{\text{CO}_2}^{\text{max}} \cdot (1 - z) \quad (18)$$

$$r_{\text{Starch}}^{\text{dark,max}} = r_{\text{Starch}}^{\text{max}} \cdot (z) \cdot (s) \quad (19)$$

$$\mu_{\text{light}} = \mu^{\text{max}} \cdot (1 - n) \cdot (z) \quad (20)$$

## 426 **Parameter estimation**

427 Metabolic capabilities across species and even strains do not remain constant. This has been one  
428 of the most significant drawbacks when trying to generate a wide-spectrum biological model.  
429 However, in this work we were able to identify five strain-specific parameters which are assumed  
430 to be inherent in the microorganism: maximum size increase  $z_{\text{max}}$ , maximum oxygen evolution  
431  $r_{\text{O}_2}^{\text{max}}$  maximum carbon uptake  $r_{\text{CO}_2}^{\text{max}}$ , nitrogen quota half-saturation coefficient  $q_h$ , and starch  
432 accumulation half-saturation coefficient  $K$ . Parameter estimation was done with MATLAB  
433 Optimization Toolbox, using the *active-set* algorithm. As a result, this model is capable of  
434 predicting the macroscopic outcome of a photobioreactor under different conditions for a single  
435 strain if these parameters are known. For each study we used one of the available sets of kinetic  
436 data to calculate these parameters, specifically data at an initial nitrogen concentration of 0.021 g  
437  $\text{L}^{-1}$  for Adesanya et al. [13] and data at an irradiance of 848  $\mu\text{mol m}^{-2} \text{s}^{-1}$  for Kim et al. [14].  
438 Regression parameter values are shown in Table S1, and a summary of all other parameters is  
439 shown in Table S2.

## 440 **Maximization of lipid productivity**

441 Five variables were manipulated to search for the optimal global lipid productivity ( $R_L$  in Eq. (21))  
442 condition: initial lamp irradiance  $I_0$ , final lamp irradiance  $I_f$ , photoperiod  $p$ , culture duration  $t_f$ ,  
443 and a coefficient  $b_I$  which represents the shape of the light profile, as shown in Eq. (22).

$$R_L = \frac{C_{\text{Lipids}}}{t_f} \quad (21)$$

$$I(t) = a_I * t^{b_I} + I_0 \quad (22)$$

444 In Eq. (22), only  $b_I$  is used as an optimization variables, as  $a_I$  is dependent on the variables  $I_0$ ,  $I_f$   
445 and  $b_I$  itself, as presented in Eq. (23).

$$a_I = \frac{I_f - I_0}{(t_f)^{b_I}} \quad (23)$$

## 446 **Declarations**

### 447 **Authors' contributions**

448 JT and RG conceived the study. JT analyzed the data; JT, CZ, JB, RG and KZ discussed the data;  
449 JT wrote the manuscript with input of all co-authors.

### 450 **Acknowledgements**

451 JT would like to thank Ana Isabel Ramos Murillo and Johan Andrés Pasos Panqueva (UNAL-  
452 Bogota) for fruitful discussions.

453 **Competing interests**

454 The authors declare that they have no competing interests.

455

456 **Availability of data and materials**

457 The datasets analyzed are included in this article. The code used for simulations is fully available

458 in the *pbr* repository at <https://github.com/jdtibochab/pbr>.

459 **Consent for publication**

460 Not applicable.

461 **Ethics approval and consent to participate**

462 Not applicable.

463 **Funding**

464 This work was supported by the *División de Investigación de la sede Bogotá* (DIB) as part of a

465 project with HERMES code No. 41441, and by the *Sistema de Investigación* of the *Universidad*

466 *Nacional de Colombia*. Moreover, this material is based upon work supported by the National

467 Science Foundation under Grant No. 1332344 and the U.S. Department of Energy (DOE), Office

468 of Science, Office of Biological & Environmental Research under Award DE-SC0012658.

469 **References**

470 1. Chisti Y. Biodiesel from microalgae. *Trends Biotechnol.* 2008;26:126–31.

471 2. Adamczyk M, Lasek J, Skawińska A. CO<sub>2</sub> biofixation and growth kinetics of *Chlorella vulgaris*

- 472 and *Nannochloropsis gaditana*. *Appl Biochem Biotechnol*. 2016;179:1248–61.
- 473 3. Geider RJ, DeLucia EH, Falkowski PG, Finzi A, Grime JP, Grace J, et al. Primary productivity  
474 of planet earth: biological determinants and physical constraints in terrestrial and aquatic habitats.  
475 *Glob Chang Biol*. Wiley; 2001;7 (8):849–82.
- 476 4. Sandeep K. Sub- and supercritical water technology for biofuels. In: Lee JW, editor. *Adv*  
477 *Biofuels Bioprod*. New York: Springer; 2013. p. 147–83.
- 478 5. Muylaert K, Bastiaens L, Vandamme D, Gouveia L. Harvesting of microalgae: overview of  
479 process options and their strengths and drawbacks. *Microalgae-based biofuels Bioprod*. Lisbon:  
480 Woodhead Publishing; 2017. p. 113–32.
- 481 6. Zuñiga C, Levering J, Antoniewicz MR, Guarnieri MT, Betenbaugh MJ, Zengler K, et al.  
482 Predicting dynamic metabolic demands in the photosynthetic eukaryote *Chlorella vulgaris*. *Plant*  
483 *Physiol*. American Society of Plant Biologists; 2017;176:450–62.  
484 <http://www.plantphysiol.org/lookup/doi/10.1104/pp.17.00605>. Accessed 2017 Sep 26.
- 485 7. Tibocho-Bonilla JD, Zuñiga C, Godoy-Silva RD, Zengler K. Advances in metabolic modeling  
486 of oleaginous microalgae. *Biotechnol Biofuels*. BioMed Central; 2018;11:241.  
487 <https://biotechnologyforbiofuels.biomedcentral.com/articles/10.1186/s13068-018-1244-3>.  
488 Accessed 2018.
- 489 8. Sajjadi B, Chen WY, Raman AAA, Ibrahim S. Microalgae lipid and biomass for biofuel  
490 production: A comprehensive review on lipid enhancement strategies and their effects on fatty  
491 acid composition. *Renew. Sustain. Energy Rev*. Pergamon; 2018. p. 200–32.  
492 <https://www.sciencedirect.com/science/article/pii/S1364032118305562>. Accessed 2018 Dec 1.
- 493 9. Iehana M. Kinetic analysis of the growth of *Chlorella vulgaris*. *Biotechnol Bioeng*.

494 1990;36:198–206.

495 10. Wijanarko A, Witarto AB, Soemantojo RW. Effect of photoperiodicity on CO<sub>2</sub> fixation by  
496 *Chlorella vulgaris* Buitenzorg in bubble column photobioreactor for food supplement production.  
497 Makara Teknol. 2004;8:35–43.

498 11. Filali R, Tebbani S, Dumur D, Isambert A, Pareau D, Lopes F. Growth modeling of the green  
499 microalga *Chlorella vulgaris* in an air-lift photobioreactor. IFAC Proc Vol. 2011;18:10603–8.

500 12. Concas A, Pisu M, Cao G. Mathematical modelling of *Chlorella vulgaris* growth in semi-batch  
501 photobioreactors fed with pure CO<sub>2</sub>. Chem Eng Trans. 2013;32:1021–6.

502 13. Adesanya VO, Davey MP, Scott SA, Smith AG. Kinetic modelling of growth and storage  
503 molecule production in microalgae under mixotrophic and autotrophic conditions. Bioresour  
504 Technol. 2014;157:293–304.

505 14. Kim J, Lee JY, Lu T. A model for autotrophic growth of *Chlorella vulgaris* under  
506 photolimitation and photoinhibition in cylindrical photobioreactor. Biochem Eng J. Elsevier B.V.;  
507 2015;99:55–60. <http://dx.doi.org/10.1016/j.bej.2015.03.010>. Accessed 2015.

508 15. Sakarika M. Kinetic study of biomass growth and lipid synthesis of the microalga *Chlorella*  
509 *vulgaris* under heterotrophic conditions and energy valorization of the produced biomass. 2016.

510 16. Chang HX, Huang Y, Fu Q, Liao Q, Zhu X. Kinetic characteristics and modeling of microalgae  
511 *Chlorella vulgaris* growth and CO<sub>2</sub> biofixation considering the coupled effects of light intensity  
512 and dissolved inorganic carbon. Bioresour. Technol. Elsevier Ltd; 2016.  
513 <http://dx.doi.org/10.1016/j.biortech.2016.01.087>. Accessed 2016.

514 17. Mansouri M. Predictive modeling of biomass production by *Chlorella vulgaris* in a draft- tube  
515 airlift photobioreactor. Adv Environ Technol. 2017;3:119–26.

- 516 18. Lee E, Jalalizadeh M, Zhang Q. Growth kinetic models for microalgae cultivation: A review.  
517 Algal Res. 2015. p. 497–512.
- 518 19. Chang RL, Ghamsari L, Manichaikul A, Hom EFY, Balaji S, Fu W, et al. Metabolic network  
519 reconstruction of *Chlamydomonas* offers insight into light-driven algal metabolism. Mol Syst Biol.  
520 2011;7. <http://msb.embopress.org/cgi/doi/10.1038/msb.2011.52>. Accessed 2011.
- 521 20. Zuñiga C, Li C-T, Huelsman T, Levering J, Zielinski DC, McConnell BO, et al. Genome-scale  
522 metabolic model for the green alga *Chlorella vulgaris* UTEX 395 accurately predicts phenotypes  
523 under autotrophic, heterotrophic, and mixotrophic growth conditions. Plant Physiol. American  
524 Society of Plant Biologists; 2016;172:589–602.  
525 <http://www.plantphysiol.org/lookup/doi/10.1104/pp.16.00593>. Accessed 2016 Sep 1.
- 526 21. Broddrick JT, Welkie DG, Jallet D, Golden SS, Peers G, Palsson BO. Predicting the metabolic  
527 capabilities of *Synechococcus elongatus* PCC 7942 adapted to different light regimes. Metab Eng.  
528 Academic Press; 2019;52:42–56.  
529 <https://www.sciencedirect.com/science/article/pii/S1096717618303288?via%3Dihub>. Accessed  
530 2019 Mar 1.
- 531 22. Broddrick JT, Rubin BE, Welkie DG, Du N, Mih N, Diamond S, et al. Unique attributes of  
532 cyanobacterial metabolism revealed by improved genome-scale metabolic modeling and essential  
533 gene analysis. Proc Natl Acad Sci. National Academy of Sciences; 2016;113:E8344–53.  
534 <http://www.pnas.org/lookup/doi/10.1073/pnas.1613446113>. Accessed 2016 Dec 20.
- 535 23. Tibocho-bonilla JD, Kumar M, Richelle A, Godoy-silva RD, Zengler K, Zuñiga C. Dynamic  
536 resource allocation drives growth under nitrogen starvation in eukaryotes. npj Syst Biol Appl.  
537 Springer US; 2020;1–9. <http://dx.doi.org/10.1038/s41540-020-0135-y>. Accessed 2020.

- 538 24. Li CT, Yelsky J, Chen Y, Zuñiga C, Eng R, Jiang L, et al. Utilizing genome-scale models to  
539 optimize nutrient supply for sustained algal growth and lipid productivity. *npj Syst Biol Appl*.  
540 Nature Publishing Group; 2019;5:1–11. <https://www.nature.com/articles/s41540-019-0110-7>.  
541 Accessed 2019 Dec 1.
- 542 25. Zuñiga C, Li CT, Yu G, Al-Bassam MM, Li TT, Jiang L, et al. Environmental stimuli drive a  
543 transition from cooperation to competition in synthetic phototrophic communities. *Nat Microbiol*.  
544 Springer US; 2019;4:2184–91. <http://dx.doi.org/10.1038/s41564-019-0567-6>. Accessed 2019.
- 545 26. Bold HC. The Morphology of *Chlamydomonas chlamydogama*, Sp. Nov. *Bull Torrey Bot*  
546 *Club. Torrey Botanical Society*; 1949;76:101.  
547 <https://www.jstor.org/stable/2482218?origin=crossref>. Accessed 1949 Mar.
- 548 27. Masojídek J, Torzillo G, Koblížek M, Kopecký J, Bernardini P, Sacchi A, et al.  
549 Photoadaptation of two members of the Chlorophyta (*Scenedesmus* and *Chlorella*) in laboratory  
550 and outdoor cultures: Changes in chlorophyll fluorescence quenching and the xanthophyll cycle.  
551 *Planta*. 1999;209:126–35.
- 552 28. Garmyn M, Young AR, Miller SA. Mechanisms of and variables affecting UVR  
553 photoadaptation in human skin. *Photochem Photobiol Sci. Royal Society of Chemistry*;  
554 2018;17:1932–40.
- 555 29. Sun Y, Liao Q, Huang Y, Xia A, Fu Q, Zhu X, et al. Application of growth-phase based light-  
556 feeding strategies to simultaneously enhance *Chlorella vulgaris* growth and lipid accumulation.  
557 *Bioresour Technol. Elsevier*; 2018;256:421–30. <https://doi.org/10.1016/j.biortech.2018.02.045>.  
558 Accessed 2018.
- 559 30. Baroli I, Melis A. Photoinhibition and repair in *Dunaliella salina* acclimated to different



560 growth irradiances. *Planta*. 1996;198:640–6.

561 31. Han BP. A mechanistic model of algal photoinhibition induced by photodamage to  
562 photosystem-II. *J Theor Biol*. 2002;214:519–27.

563 32. Pfendler S, Alaoui-sossé B, Alaoui-sossé L, Bousta F, Aleya L. Effects of UV-C radiation on  
564 *Chlorella vulgaris*, a biofilm-forming alga. *J Appl Phycol. Journal of Applied Phycology*; 2018;

565 33. Henson MA. Genome-scale modeling of microbial metabolism with temporal and spatial  
566 resolution. *Front Bioeng Biotechnol*. 2017;43:1164–71.

567 <https://www.ncbi.nlm.nih.gov/pmc/articles/PMC5587135/pdf/nihms901755.pdf>. Accessed 2017.

568 34. Westermarck S, Steuer R. Toward Multiscale Models of Cyanobacterial Growth: A Modular  
569 Approach. *Front Bioeng Biotechnol*. 2016;4:1–24.  
570 <http://journal.frontiersin.org/article/10.3389/fbioe.2016.00095/full>. Accessed 2016.

571 35. Jeong DH, Lee JM. Integrating flux balance analysis into microalgae growth kinetics for  
572 dynamic simulation. *IFAC Proc. Vol. IFAC*; 2013. [http://dx.doi.org/10.3182/20131218-3-IN-](http://dx.doi.org/10.3182/20131218-3-IN-2045.00080)  
573 [2045.00080](http://dx.doi.org/10.3182/20131218-3-IN-2045.00080). Accessed 2013.

574 36. Baroukh C, Muñoz-Tamayo R, Steyer JP, Bernard O. A new framework for metabolic  
575 modeling under non-balanced growth. Application to carbon metabolism of unicellular  
576 microalgae. *PLoS One. IFAC*; 2013;12:107–12.  
577 <http://journals.plos.org/plosone/article/file?id=10.1371/journal.pone.0104499&type=printable>.  
578 Accessed 2013.

579 37. Bialon J, Rath T. Growth rates and photon efficiency of *Chlorella vulgaris* in relation to photon  
580 absorption rates under different LED-types. *Algal Res. Elsevier*; 2018;31:204–15.  
581 <https://doi.org/10.1016/j.algal.2018.02.007>. Accessed 2018.

- 582 38. Diamond S, Jun D, Rubin BE, Golden SS. The circadian oscillator in *Synechococcus elongatus*  
583 controls metabolite partitioning during diurnal growth. *Proc Natl Acad Sci.* 2015;112:E1916–25.  
584 <http://www.pnas.org/lookup/doi/10.1073/pnas.1504576112>. Accessed 2015.
- 585 39. Bose A, Chakraborty S. Mathematical modelling of the effects of circadian rhythm on  
586 microalgal growth in phototrophic and mixotrophic cultures. *Chem Eng Trans.* 2016;52:955–60.
- 587 40. Xu Y, Ibrahim IM, Harvey PJ. The influence of photoperiod and light intensity on the growth  
588 and photosynthesis of *Dunaliella salina* (chlorophyta) CCAP 19/30. *Plant Physiol Biochem.*  
589 Elsevier Masson SAS; 2016;106:305–15. <http://dx.doi.org/10.1016/j.plaphy.2016.05.021>.  
590 Accessed 2016.
- 591 41. Martins BMC, Tooke AK, Thomas P, Locke JCW. Cell size control driven by the circadian  
592 clock and environment in cyanobacteria. *PNAS.* 2018;
- 593 42. Serra-Maia R, Bernard O, Gonçalves A, Bensalem S, Lopes F. Influence of temperature on  
594 *Chlorella vulgaris* growth and mortality rates in a photobioreactor. *Algal Res.* Elsevier B.V.;  
595 2016;18:352–9. <http://dx.doi.org/10.1016/j.algal.2016.06.016>. Accessed 2016.
- 596 43. Ng CY, Preciat G, Žagare A, Chan SHJ, Aurich MK, Assal DC El, et al. Creation and analysis  
597 of biochemical constraint-based models: the COBRA Toolbox v3.0. 2018;
- 598 44. Yun YS, Park JM. Attenuation of monochromatic and polychromatic lights in *Chlorella*  
599 *vulgaris* suspensions. *Appl Microbiol Biotechnol.* 2001;55:765–70.
- 600 45. Naderi G, Znad H, Tade MO. Investigating and modelling of light intensity distribution inside  
601 algal photobioreactor. *Chem Eng Process Process Intensif.* Elsevier; 2017;122:530–7.  
602 <https://doi.org/10.1016/j.cep.2017.04.014>. Accessed 2017.
- 603 46. Salleh SF, Kamaruddin A, Uzir MH, Mohamed AR, Shamsuddin AH. Modeling the light

- 604 attenuation phenomenon during photoautotrophic growth of *A. variabilis* ATCC 29413 in a batch  
605 photobioreactor. *J Chem Technol Biotechnol*. 2017;92:358–66.
- 606 47. Suh IS, Lee SB. A light distribution model for an internally radiating photobioreactor.  
607 *Biotechnol Bioeng*. 2003;82:180–9.
- 608 48. Csögör Z, Herrenbauer M, Schmidt K, Posten C. Light distribution in a novel photobioreactor  
609 - Modelling for optimization. *J Appl Phycol*. 2001;13:325–33.
- 610 49. Csögör Z, Herrenbauer M, Perner I, Schmidt K, Posten C. Design of a photo-bioreactor for  
611 modelling purposes. *Chem Eng Process Process Intensif*. 1999;38:517–23.
- 612 50. Han BP, Virtanen M, Koponen J, Straskraba M. Effect of photoinhibition on algal  
613 photosynthesis: a dynamic model. *J Plankton Res*. 2000;22:865–85.  
614 <https://academic.oup.com/plankt/article-lookup/doi/10.1093/plankt/22.5.865>. Accessed 2000.
- 615 51. Lv JM, Cheng LH, Xu XH, Zhang L, Chen HL. Enhanced lipid production of *Chlorella*  
616 *vulgaris* by adjustment of cultivation conditions. *Bioresour Technol*. Elsevier Ltd;  
617 2010;101:6797–804. <http://dx.doi.org/10.1016/j.biortech.2010.03.120>. Accessed 2010.
- 618 52. Taguchi S. Relationship Between Photosynthesis and Cell Size of Marine Diatoms. *J. Phycol.*  
619 1976. p. 185–9.
- 620 53. Thompson PA, Harrison PJ, Parslow JS. Influence of irradiance on cell volume and carbon  
621 quota for ten species of marine phytoplankton. *J. Phycol.* 1991. p. 351–60.
- 622
